# Supplementary material
Source: HighWire-hosted journal article supplement (https://erj.ersjournals.com/content/56/1/2001637)
Supplement: inline-supplementary-material-1 [file inline-supplementary-material-1.pdf]

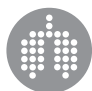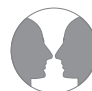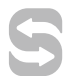

SHAREABLE PDF

# Observational studies and “the eye of the beholder”

Miriam J. Johnson<sup>1,2</sup>, Magnus Ekström<sup>2,3</sup> and David C. Currow<sup>1,2</sup>

**Affiliations:** <sup>1</sup>Wolfson Palliative Care Research Centre, University of Hull, Hull, UK. <sup>2</sup>IMPACCT, Faculty of Health, University of Technology Sydney, Ultimo, Australia. <sup>3</sup>Lund University, Faculty of Medicine, Dept of Clinical Sciences Lund, Respiratory Medicine and Allergology, Lund, Sweden.

**Correspondence:** Miriam J. Johnson, Wolfson Palliative Care Research Centre, University of Hull, Allam Medical Building, Cottingham Road, Hull, HU6 7RX, UK. E-mail: miriam.johnson@hums.ac.uk

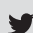

@ERSpublications

**Observational studies need explanations in both directions of association to avoid interpretation bias**  
<https://bit.ly/3d7kLnG>

**Cite this article as:** Johnson MJ, Ekström M, Currow DC. Observational studies and “the eye of the beholder”. *Eur Respir J* 2020; 56: 2001637 [https://doi.org/10.1183/13993003.01637-2020].

This single-page version can be shared freely online.

## *To the Editor:*

NWARU *et al.* [1] report a dose-related association between short-acting  $\beta_2$ -agonists (SABA) and poorer clinical outcomes (exacerbations, emergency department visits, hospital admissions and mortality) in asthma. Acknowledging that observational studies cannot establish causality, they conclude: “Regardless of whether there is a causal effect of SABA use and these adverse effects, or if they are mainly a marker for more severe asthma and/or a reflection of the frailty of the patients, increased use of SABA should alert clinicians to monitor these patients more closely.” These are important conclusions that should inform clinical care and be incorporated into international guidelines.
